# Supplementary material for: Efficacy of pulmonary artery pressure monitoring in patients with chronic heart failure: a meta-analysis of three randomized controlled trials
Source: PubMed Central journal article supplement — Eur Heart J. 2023 May 20;44(37):3658–68. doi: 10.1093/eurheartj/ehad346 (PMC10542655; doi:10.1093/eurheartj/ehad346), 2023-05-20
Supplement: ehad346_supplementary_data.pdf [file ehad346_supplementary_data.pdf]

**Supplementary Table 1. PICOTS criteria for screening of studies**

| <b>PICOTS domain</b> | <b>Description</b>                                                                                                                                               |
|----------------------|------------------------------------------------------------------------------------------------------------------------------------------------------------------|
| Population           | Patients with chronic heart failure and a HF hospitalization or equivalent in the past twelve months.                                                            |
| Intervention         | Hemodynamically guided remote monitoring of pulmonary artery pressures using the CardioMEMS HF system.                                                           |
| Comparator           | A separate control group without (use of) remote pulmonary artery pressure monitoring.                                                                           |
| Outcome              | (1) HF events (hospitalization or urgent HF visits with need for intravenous diuretic therapy); (2) Mortality; (3) HF events and mortality as combined endpoint. |
| Study design         | Randomized Controlled Trials including at least 100 patients.                                                                                                    |

HF: Heart Failure.

**Supplementary Table 2. Random- and fixed effects models for meta-analyses of clinical endpoints**

| Analysis                                                          | Random effects model |           |         | Fixed effects model |           |         |
|-------------------------------------------------------------------|----------------------|-----------|---------|---------------------|-----------|---------|
|                                                                   | HR                   | 95%CI     | p-value | HR                  | 95%CI     | p-value |
| Total HF hospitalizations, urgent visits, and all-cause mortality | 0.75                 | 0.61-0.91 | 0.0037  | 0.76                | 0.68-0.85 | <0.0001 |
| Total HF hospitalizations and all-cause mortality                 | 0.74                 | 0.62-0.89 | 0.0010  | 0.75                | 0.67-0.84 | <0.0001 |
| Total HF hospitalizations and urgent visits                       | 0.71                 | 0.57-0.88 | 0.0018  | 0.73                | 0.64-0.82 | <0.0001 |
| Total HF hospitalizations                                         | 0.70                 | 0.58-0.86 | 0.0005  | 0.72                | 0.63-0.81 | <0.0001 |
| All-cause mortality                                               | 0.92                 | 0.73-1.16 | 0.4952  | 0.92                | 0.73-1.16 | 0.4952  |

HF: Heart Failure; HR: Hazard Ratio; 95% CI: 95 Confidence Interval.

**Supplementary Table 3. Random effects models for meta-analyses of subgroups including interaction tests (total heart failure hospitalizations, urgent visits, all-cause mortality)**

| Variable | Subgroup analysis      | N, %*     | Random effects model |           |               |
|----------|------------------------|-----------|----------------------|-----------|---------------|
|          |                        |           | HR                   | 95% CI    | P interaction |
| Age      | Age $\geq$ 71          | 656 (49)  | 0.76                 | 0.60-0.97 | 0.65          |
|          | Age <71                | 692 (51)  | 0.80                 | 0.51-1.25 |               |
| Sex      | Women                  | 611 (32)  | 0.77                 | 0.49-1.21 | 0.89          |
|          | Men                    | 1287 (68) | 0.73                 | 0.47-1.14 |               |
| Etiology | Ischemic               | 571 (45)  | 0.84                 | 0.66-1.07 | 0.52          |
|          | Non-ischemic           | 688 (55)  | 0.64                 | 0.28-1.46 |               |
| Device   | Device (ICD or CRT)    | 765 (57)  | 0.78                 | 0.63-0.98 | 0.68          |
|          | No device (ICD or CRT) | 583 (43)  | 0.83                 | 0.58-1.18 |               |
| LVEF     | LVEF $\geq$ 50%        | 609 (67)  | 0.55                 | 0.26-1.15 | 0.84          |
|          | LVEF <50%              | 297 (33)  | 0.64                 | 0.44-0.94 |               |
|          | LVEF >40%              | 675 (34)  | 0.69                 | 0.47-1.00 | 0.65          |
|          | LVEF $\leq$ 40%        | 1248 (66) | 0.76                 | 0.63-0.91 |               |
| NYHA     | NYHA II                | 296 (16)  | 0.72                 | 0.49-1.05 | 0.15          |
|          | NYHA III               | 1548 (82) | 0.73                 | 0.60-0.88 |               |
|          | NYHA IV                | 54 (3)    | 1.68                 | 0.88-3.20 |               |

ICD: Implantable Cardioverter defibrillator; CRT: Cardiac Resynchronization Therapy; LVEF: Left Ventricular Ejection Fraction; NYHA: New York Heart Association; \*Percentage based upon patients and studies with available subgroup data; HR: Hazard Ratio; 95% CI: 95 Confidence Interval.

Supplementary Figure 1. PRISMA flowchart of the included studies

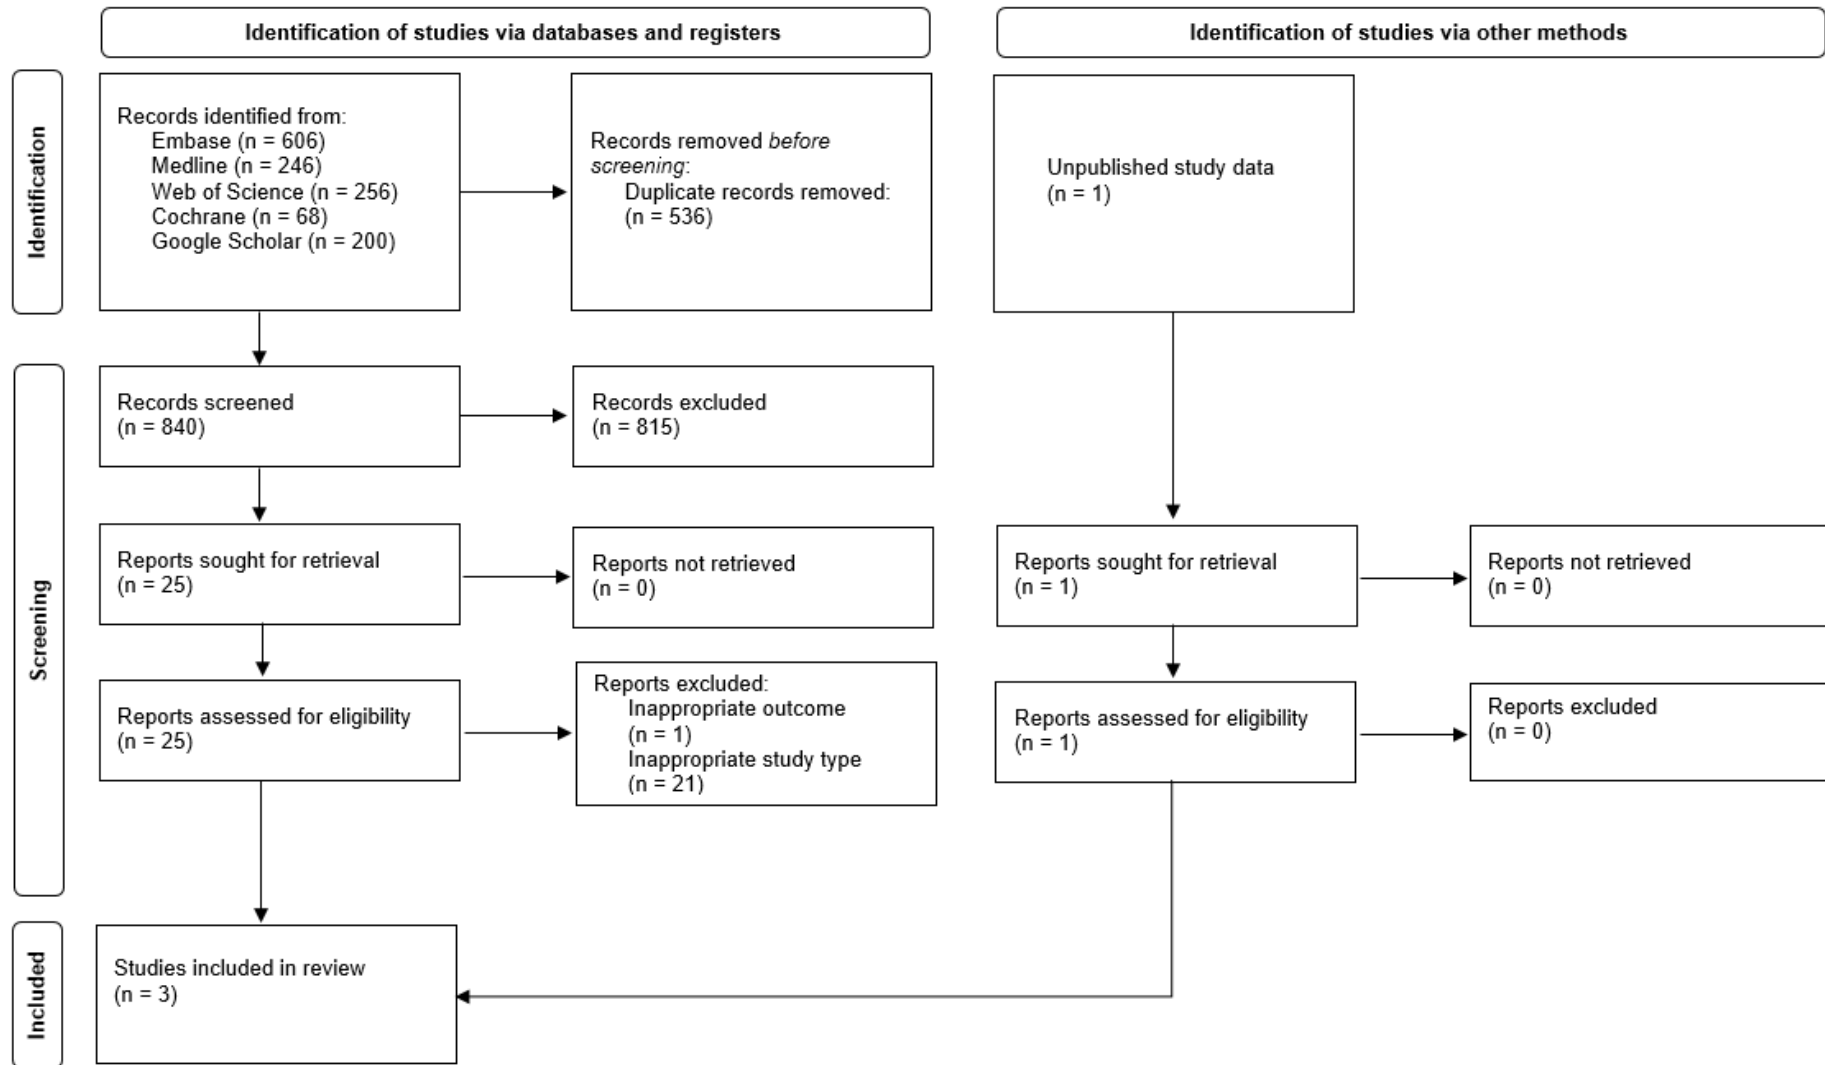

**Supplementary Figure 2. Risk of bias assessment**

|       |            | Risk of bias domains |    |    |    |    |         |
|-------|------------|----------------------|----|----|----|----|---------|
|       |            | D1                   | D2 | D3 | D4 | D5 | Overall |
| Study | CHAMPION   |                      |    |    |    |    |         |
|       | GUIDE-HF   |                      |    |    |    |    |         |
|       | MONITOR-HF |                      |    |    |    |    |         |

Domains:  
 D1: Bias due to randomisation.  
 D2: Bias due to deviations from intended intervention.  
 D3: Bias due to missing data.  
 D4: Bias due to outcome measurement.  
 D5: Bias due to selection of reported result.

Judgement  
 Low  
 Some concerns

### Supplementary Figure 3. Pre-COVID sensitivity analysis for clinical endpoints

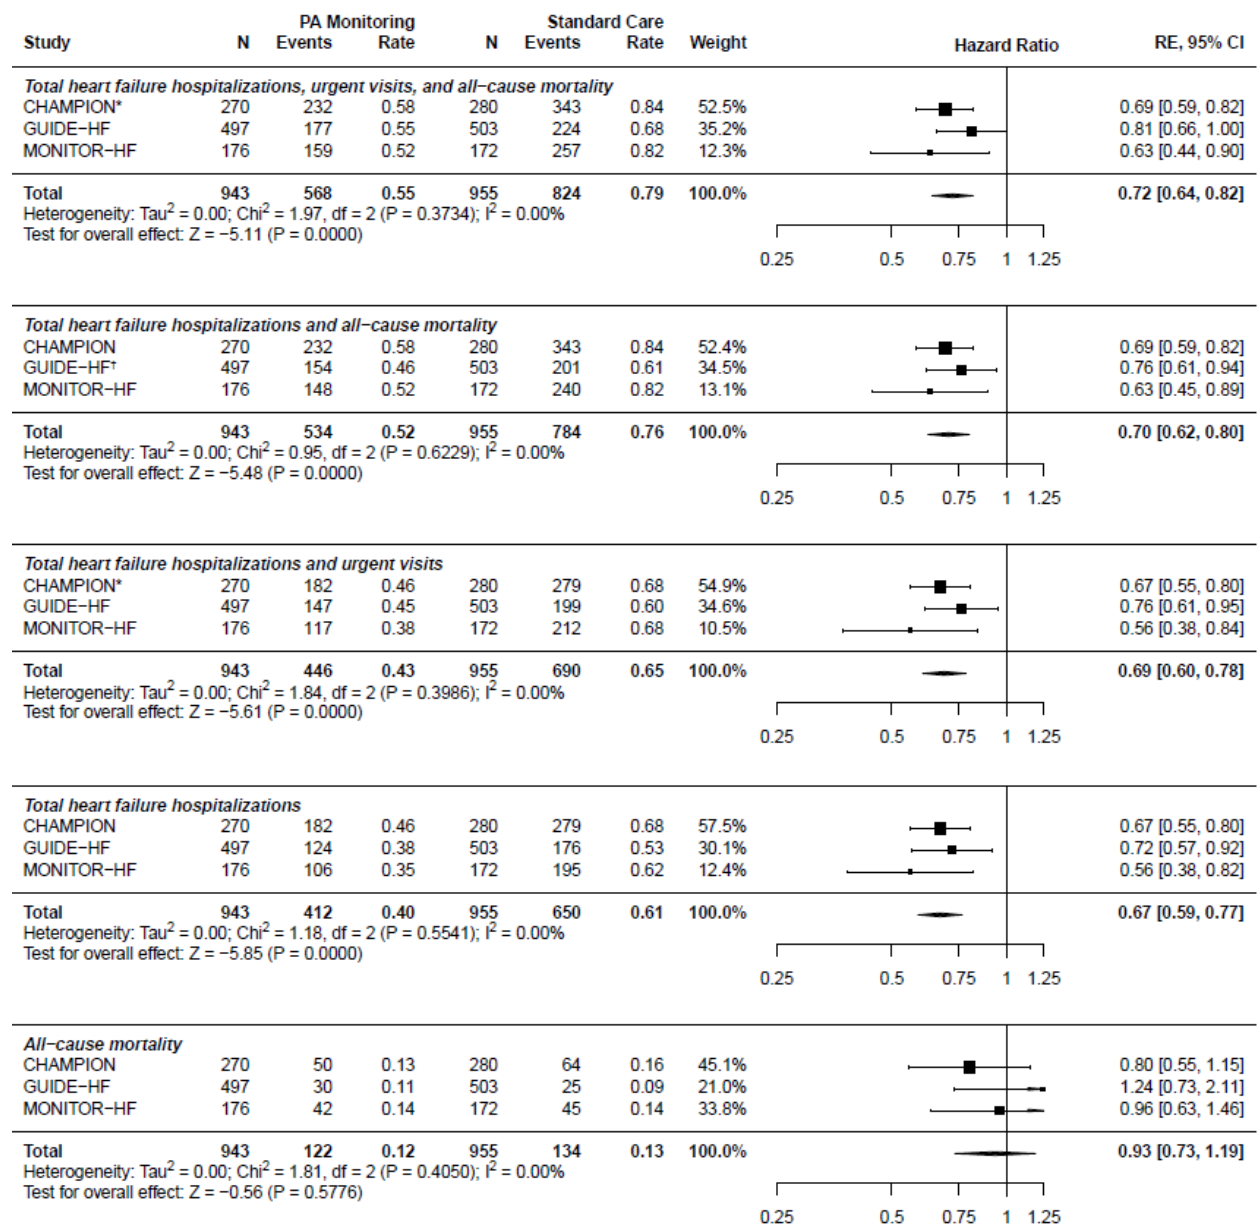

\*CHAMPION did not report data on urgent visits; †Calculated and included as Incidence Rate Ratio (IRR); PA: Pulmonary Artery; RE: Random Effects; 95% CI: 95% Confidence Interval; All rates are reported as events per patient-year.

## Supplementary Figure 4. Subgroup analysis - pre-COVID sensitivity analysis for clinical endpoints - (Heart failure hospitalizations, urgent visits, and mortality)

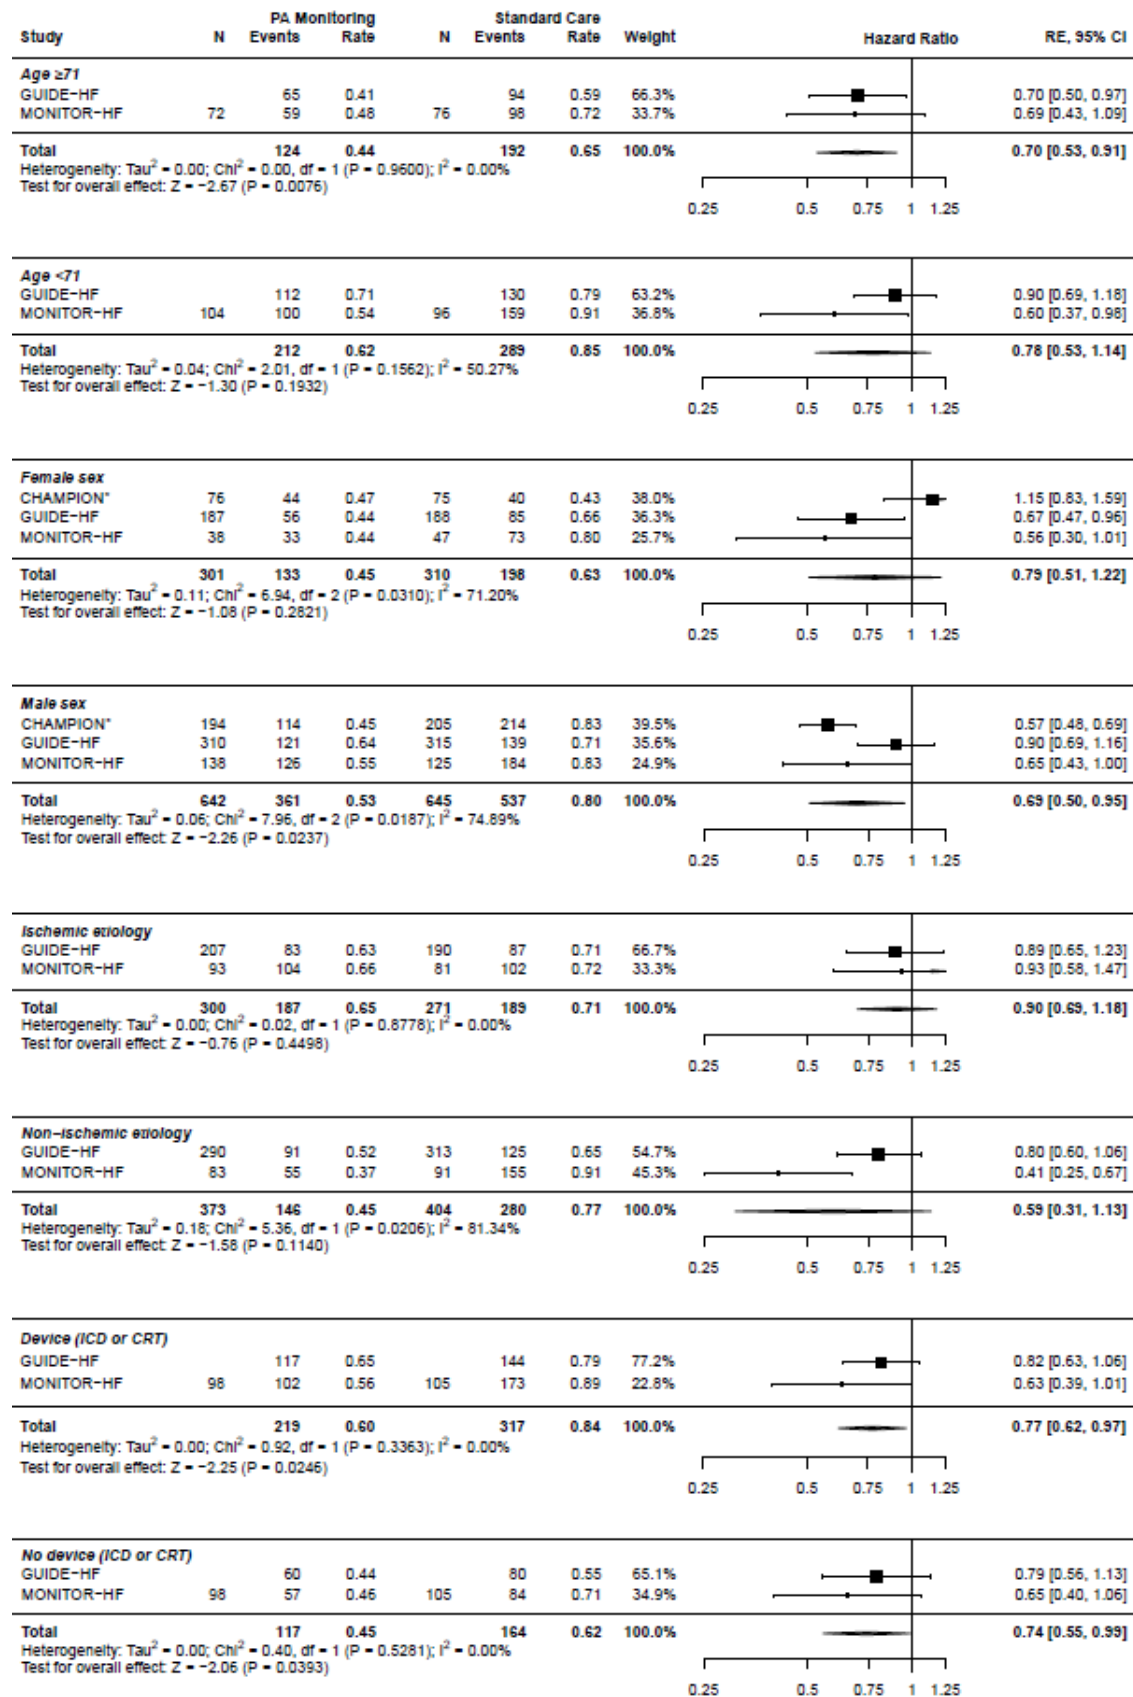

### Supplementary Figure 4. Pre-COVID sensitivity analysis for clinical endpoints - (HF hospitalizations, urgent visits, and mortality) – subgroup analysis (continued)

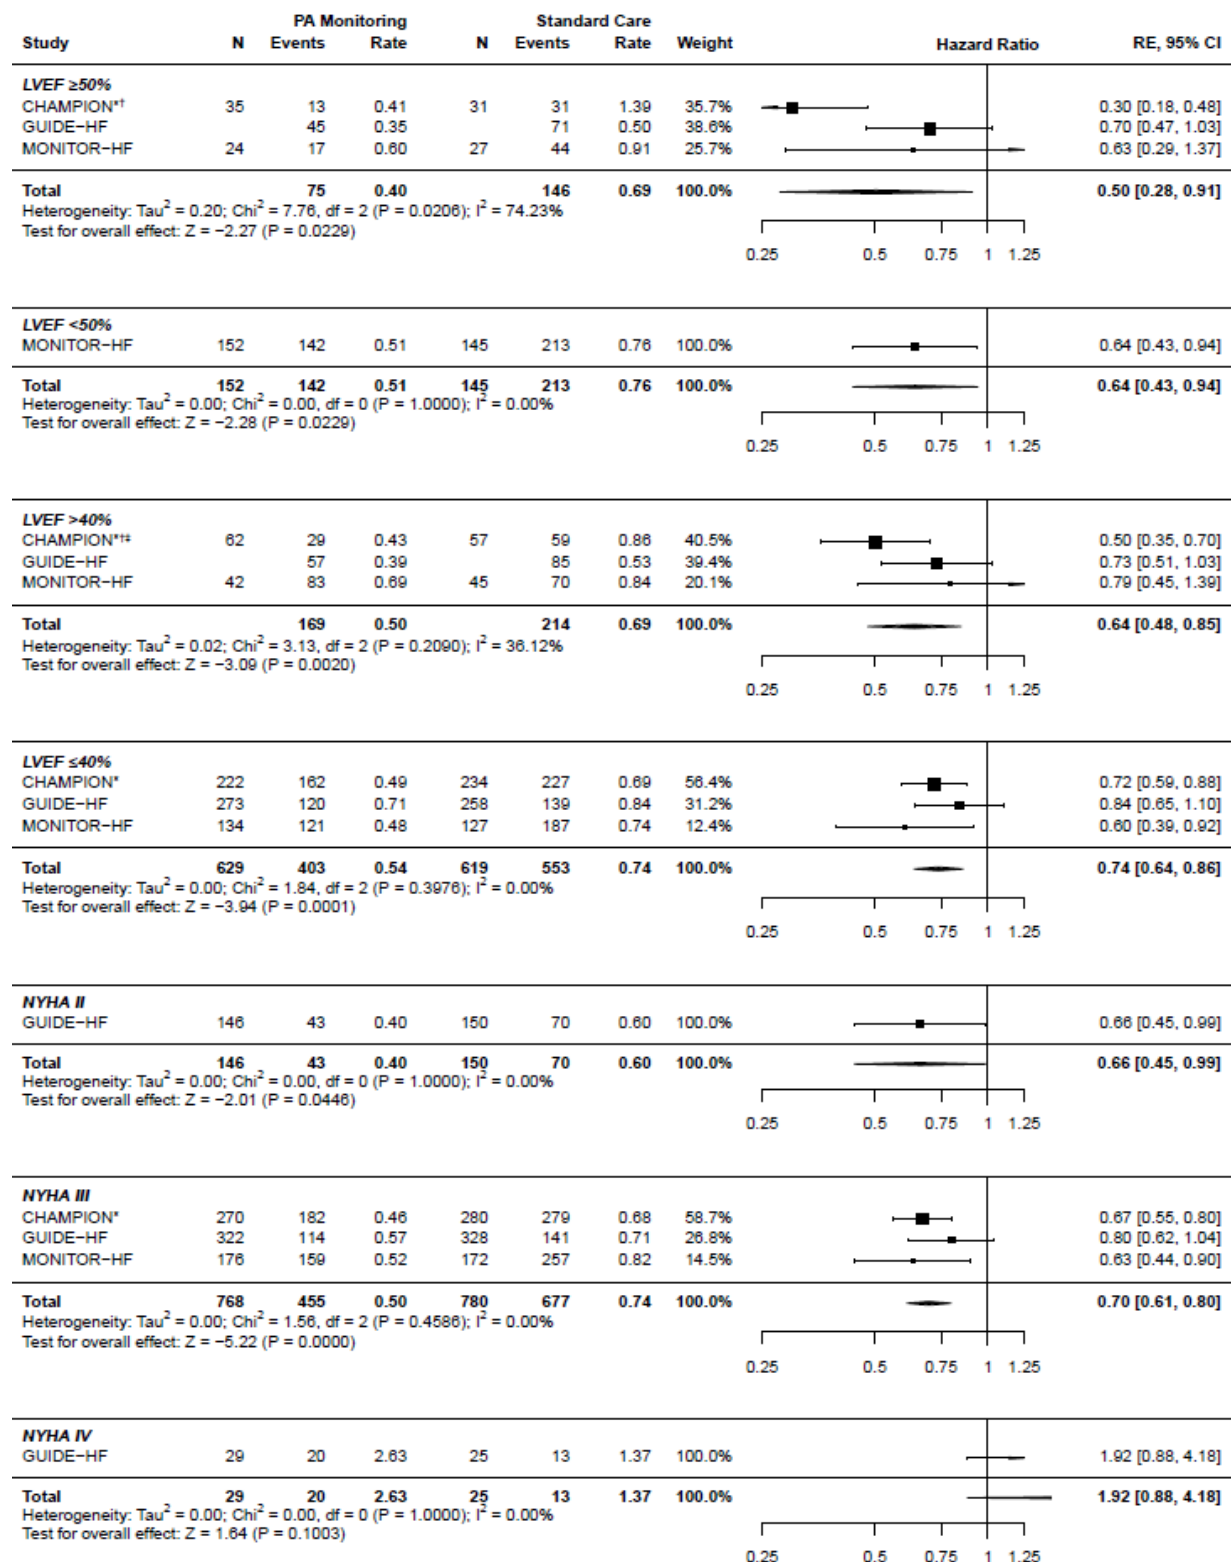

\*CHAMPION did not report data on urgent visits; †Calculated and included as Incidence Rate Ratio (IRR); ‡CHAMPION only reported data for LVEF ≥40%; PA: Pulmonary Artery; RE: Random Effects; 95% CI: 95% Confidence Interval; All rates are reported as events per patient-year.



## Systematic search adapted for each database

### Medline

((cardiomem\* OR ((pulmonar\* OR lung) ADJ9 (arter\*) ADJ9 (pressur\*) ADJ9 (sensor\* OR monitor\*)) OR ((intravascular) ADJ9 (haemodynamic OR hemodynamic) ADJ9 (monitor\* OR sensor\*))) .ab,ti,kf.) AND (exp "Heart Failure"/ OR (((heart\* OR cardiac OR cardial) ADJ3 (fail\* OR insuffic\*)) OR HF).ab,ti,kf.) NOT (exp animals/ NOT humans/) NOT (news OR congres\* OR abstract\* OR book\* OR chapter\* OR dissertation abstract\*).pt. NOT ((exp "Child"/ OR exp "Infant"/ OR "Adolescent"/) NOT (exp "Adult"/)) NOT ("Case Reports".pt. OR "Case Reports as Topic"/ OR (case-report).ti.)

### Embase

('implantable pulmonary artery pressure monitoring system'/de OR 'cardiovascular monitoring device'/de OR (cardiomem\* OR ((pulmonar\* OR lung) NEAR/9 (arter\*) NEAR/9 (pressur\*) NEAR/9 (sensor\* OR monitor\*)) OR ((intravascular) NEAR/9 (haemodynamic OR hemodynamic) NEAR/9 (monitor\* OR sensor\*))) :ab,ti,kw) AND ('heart failure'/exp OR (((heart\* OR cardiac OR cardial) NEAR/3 (fail\* OR insuffic\*)) OR HF):ab,ti,kw) NOT ([animals]/lim NOT [humans]/lim) NOT ([Conference Abstract]/lim OR [Conference Review]/lim) NOT ('child'/exp NOT ('adult'/exp OR 'adolescent'/de)) NOT ('case report'/de OR (case-report):ti)

### Web of Science

TS=(((cardiomem\* OR ((pulmonar\* OR lung) NEAR/9 (arter\*) NEAR/9 (pressur\*) NEAR/9 (sensor\* OR monitor\*)) OR ((intravascular) NEAR/9 (haemodynamic OR hemodynamic) NEAR/9 (monitor\* OR sensor\*)))) AND (((((heart\* OR cardiac OR cardial) NEAR/3 (fail\* OR insuffic\*)) OR HF)) NOT ((animal\* OR rat OR rats OR mouse OR mice OR murine OR dog OR dogs OR canine OR cat OR cats OR feline OR rabbit OR cow OR cows OR bovine OR rodent\* OR sheep OR ovine OR pig OR swine OR porcine OR veterinar\* OR chick\* OR zebrafish\* OR baboon\* OR nonhuman\* OR primate\* OR cattle\* OR goose OR geese OR duck OR macaque\* OR avian\* OR bird\* OR fish\*) NOT (human\* OR patient\* OR women OR woman OR men OR man))) NOT DT=(Meeting Abstract OR Meeting Summary) NOT TI=(case-report\*) NOT TI=((child\* OR baby OR infant OR infants OR babies) NOT (adult\* OR men OR man OR woman OR women OR female\* OR male\*))

### Cochrane Central

((cardiomem\* OR ((pulmonar\* OR lung) NEAR/9 (arter\*) NEAR/9 (pressur\*) NEAR/9 (sensor\* OR monitor\*)) OR ((intravascular) NEAR/9 (haemodynamic OR hemodynamic) NEAR/9 (monitor\* OR sensor\*))) :ab,ti,kw) AND (((((heart\* OR cardiac OR cardial) NEAR/3 (fail\* OR insuffic\*)) OR HF):ab,ti,kw) NOT ((case-report):ti) NOT ((child\* OR baby OR infant OR infants OR babies) NOT (adult\* OR men OR man OR woman OR women OR female\* OR male\*)):ti

### Google Scholar

Cardiomems "heart|cardiac|cardial failure|insufficiency" -"case report" -"case reports" -child -children
